1

2 ***In situ* growth of anammox bacteria in seafloor sediments**

3

4 Rui Zhao<sup>1,2\*</sup>, José M. Mogollón<sup>3</sup>, Sophie S. Abby<sup>4,+</sup>, Christa Schleper<sup>4</sup>, Jennifer F. Biddle<sup>2</sup>, Desiree  
5 Roerdink<sup>1</sup>, Ingunn H. Thorseth<sup>1</sup>, and Steffen L. Jørgensen<sup>1</sup>

6

7 <sup>1</sup> K. G. Jebsen Centre for Deep-Sea Research, University of Bergen, Bergen, Norway.

8 <sup>2</sup> School of Marine Science and Policy, University of Delaware, Lewes, Delaware, USA.

9 <sup>3</sup> Institute of Environmental Sciences (CML), Leiden University, Leiden, Netherlands.

10 <sup>4</sup> Division of Archaea Biology and Ecogenomics, Department of Ecogenomics and System Biology,  
11 University of Vienna, Vienna, Austria.

12 <sup>+</sup> Present address: University of Grenoble Alpes, CNRS, Grenoble INP, TIMC-IMAG, Grenoble,  
13 France.

14

15 \* Correspondence: Rui Zhao, School of Marine Science and Policy, University of Delaware, Lewes,  
16 Delaware, USA. [ruizhao@udel.edu](mailto:ruizhao@udel.edu).

17

18 **The deep biosphere buried in marine sediments was estimated to host an equal number**  
19 **of microbes as found in the above oceans <sup>1</sup>. It has been debated if these cells are alive**  
20 **and active <sup>2</sup>, and their per cell energy availability does not seem to allow for net**  
21 **population growth <sup>3</sup>. Here, we report the growth of anammox bacteria in ~80,000 year**  
22 **old subsurface sediments indicated by their four orders of magnitude abundance**  
23 **increase in the nitrate-ammonia transition zone (NATZ). Their growth coincides with a**  
24 **local increase in anammox power supply. The genome of the dominant anammox**  
25 **bacterium from the NATZ was reconstructed and showed an increased index of**  
26 **replication confirming *in situ* active growth. The genome belongs to a new *Scalindua***  
27 **species so far exclusively found in marine environments, which has the genetic capacity**  
28 **of urea and cyanate utilization and is enriched in genes allowing it to cope with external**  
29 **environmental stressors, such as energy limitation. Our results suggest that specific**

30 **microbial groups are not only able to survive over geological timescales, but also thrive**  
31 **in the deep subsurface when encountering favorable conditions.**

32

### 33 **Main text**

34 The global cell numbers of microbes in marine sediments is estimated to be on the order of  
35  $2.9\text{-}5.4 \times 10^{29}$  equaling up to  $1/3^{\text{rd}}$  of the total prokaryotic biomass on Earth <sup>1,4</sup>. A considerable  
36 portion of these cells reside beyond the bioturbation zone and constitute the marine deep  
37 biosphere <sup>5</sup>. Microbial cells in the subseafloor sediments are sealed off from recruitment of  
38 new cells and fresh substrates from the surface, and therefore are thought to suffer severe  
39 energy limitations <sup>3</sup>. Despite this, several lines of circumstantial evidence indicate that the  
40 deep microbial biosphere is alive <sup>6,7</sup>, but with extremely slow metabolic rates <sup>8,9</sup> and long  
41 turnover times of hundreds to thousands of years <sup>2,10</sup>. Although microbial growth (net biomass  
42 production) was frequently assumed <sup>10,11</sup> and recently observed in laboratory incubations <sup>12</sup>,  
43 concrete evidence of *in situ* microbial growth in the marine deep biosphere is lacking.

44 Energy availability is considered one of the most fundamental factors limiting life, but  
45 has not been explicitly demonstrated to control the changes of microbial communities in the  
46 deep biosphere <sup>13</sup>. Whereas the deep sedimentary realm is a stable environment with low  
47 energy availability, geochemical transition zones such as the sulfate-methane transition  
48 zones<sup>14</sup> and oxic-anoxic transition zones<sup>15</sup> are known to harbor higher microbial abundances  
49 than adjacent depths. Higher energy/power availability provided by the intensified redox  
50 reactions was invoked to explain this phenomenon. Whether this theory can be generalized to  
51 other geochemical transition zones, however, is still unknown. Here we present the  
52 geochemistry, microbial ecology, energetics, and genomic characterization of a novel  
53 *Scalindua* anammox bacterium from a nitrate-ammonia transition zone (NATZ, the sediment  
54 interval where  $\text{NO}_3^-$  and  $\text{NH}_4^+$  co-exist), providing compelling evidence for *in situ* microbial

55 growth associated with increased power availabilities in ~ 80,000 year old subsurface  
56 sediments.

57 We retrieved four sediment cores (2.0-3.6 meters long) from the seabed of the Arctic  
58 Mid-Ocean Ridge (AMOR) at water depths of 1653 – 3007 m (Fig. 1a and Table S1), to  
59 perform high vertical resolution geochemical measurements and microbiological analyses. All  
60 four cores exhibited similar geochemical profiles (Fig. 2a-c), summarized as follows: 1) O<sub>2</sub>  
61 monotonically decreased and was depleted at a depth of 0.4-1.2 mbsf, while dissolved Mn<sup>2+</sup>  
62 built up right below the oxygen depletion zone; 2) NO<sub>3</sub><sup>-</sup> was abundant in the oxic zone and  
63 depleted in layers below oxygen depletion depth; and 3) NH<sub>4</sub><sup>+</sup> was abundant in the deep  
64 anoxic sediment but undetectable in sediment above the nitrate depletion depth. Such  
65 geochemical profiles clearly indicate that each core harbors a NATZ, where both nitrate  
66 diffusing downward from the oxic zone and ammonium diffusing upward from deeper parts  
67 of the sediments are co-consumed, presumably via the anammox process (Fig. 2 and Table  
68 S1). Flux calculation suggested that most of the NH<sub>4</sub><sup>+</sup> flux (60-100%) diffusing from the deep  
69 anoxic sediments was consumed in the NATZ (Table S1). By revisiting meta-data of earlier  
70 studies (see Supplement Information for details), we noted that NATZ exists in many locations  
71 with water depth of 1000 to 3500 meters (Fig. 1b), and is likely widespread in the vast, yet  
72 discretely sampled, deep sea sediments.

73 We applied a one-dimensional reaction-transport model <sup>16</sup> to simulate the profiles and  
74 calculate the rates of various reactions including anammox. The applied boundary conditions  
75 (Table S2) and model parameters (Table S3), allowed a simulation matching the measured  
76 profiles of TOC, DIC, O<sub>2</sub>, NO<sub>3</sub><sup>-</sup>, NH<sub>4</sub><sup>+</sup>, and Mn<sup>2+</sup> (Fig. 2a-c), suggesting that the modeled  
77 profiles and reaction rates provided a realistic estimation of the *in situ* geochemical processes  
78 in these cores. Although thermodynamic calculations suggest the anammox reaction to be  
79 highly favorable at most depths across all cores (Gibbs free energy up to -200 kJ mol<sup>-1</sup> N;

80 Supplementary Fig. S1), anammox is known to be inhibited in the oxic zones by oxygen and  
81 limited in the deeper, anoxic sediments due to the absence of nitrate/nitrite. In line with this,  
82 our model predicts that anammox mainly occurred in the NATZs (Fig. 2d).

83 16S rRNA gene sequences show that *Scalindua*, represented by three OTUs  
84 (Operational Taxonomic Units, 97% identity), was the only genus of known anammox  
85 bacteria identified in these sediments (Fig. 3a and 3c). Consistent with the predicted anammox  
86 rate, *Scalindua* accounted for up to 24% of the total community in the NATZ, but were  
87 undetectable in the upper oxic zone and below the depth of nitrate-depletion (Fig. 2f). To  
88 determine whether such relative abundance peaks in the NATZs resulted from an increase in  
89 the absolute abundance of anammox bacteria, we quantified anammox bacteria throughout the  
90 four cores by 1) quantitative PCR targeting the *hzr* gene (encoding the hydrazine  
91 oxidoreductase) and 2) calculating their abundance by multiplying the relative abundance of  
92 anammox related taxa in the total community and the total cell numbers determined by 16S  
93 rRNA gene quantification. The absolute abundances of anammox bacteria from both methods  
94 generally agreed with each other, and showed peaks (up to  $3.9 \times 10^6$  cells  $g^{-1}$ ) in the NATZ in  
95 all cores, consistent with the relative abundance profiles (Fig. 2g).

96 To explore the factors driving the increase of anammox abundance in the subsurface,  
97 we calculated the power supply of anammox as the product of the Gibbs free energy and the  
98 modelled rate of anammox<sup>13</sup>. The anammox power supply exhibited the same distribution  
99 pattern as the anammox bacterial abundance (Fig. 2e), suggesting that the increased power  
100 availability allows a higher standing stock of anammox bacteria in this zone. Given our  
101 current knowledge of the deep subsurface, this observation strongly suggests *in situ* growth.  
102 However, another scenario that could in principle explain the increases of anammox cells in  
103 the NATZs is cell migration enabled by flagellar motility (Fig. 4). To investigate this  
104 possibility further we estimated the cell-specific metabolic rates from the predicted bulk

105 anammox rate divided by the anammox abundance. Anammox bacteria in the NATZs have  
106 cellular metabolic rates of  $10^{-3}$ - $10^{-1}$  fmol  $\text{NH}_4^+$  cell<sup>-1</sup> d<sup>-1</sup> (Supplementary Fig. S2), meaning  
107 that they oxidize on average 7-700 ammonium ions cell<sup>-1</sup> s<sup>-1</sup> (28-2800 protons cell<sup>-1</sup> s<sup>-1</sup>).  
108 Apparently, their cellular metabolic rates are lower than the required metabolic level ( $10^4$ - $10^5$   
109 protons per second) for the rotation of a single bacterial flagellum in *E. coli*<sup>17</sup>, suggesting that  
110 these anammox bacteria do not have enough metabolic activity to fuel the flagellar rotation.  
111 Instead, we speculate the function of the flagella of anammox bacteria in the subsurface are  
112 more likely facilitating their adhesion onto particle surfaces<sup>18</sup>, as the majority of microbial  
113 cells in marine sediments are particle-attached<sup>19</sup>. This could provide them a protection in  
114 unfavorable conditions like the oxic zone where they could hide in anoxic microniches.  
115 Therefore, we argue based on our quantitative data that the increase of anammox bacteria  
116 abundance in the NATZs is a result of *in situ* growth rather than cell migration.

117 We performed a metagenomic analysis of the NATZ of core GC08 to study the  
118 ecophysiology and potential adaptation mechanisms of anammox bacteria in the subsurface.  
119 From the assembled and binned metagenome, we recovered a draft genome of *Scalindua*  
120 (95.5% completion). This genome was ~3.0 Mbp, with 2,879 coding sequences across the 71  
121 scaffolds, and thus more than 1 Mbp smaller than other known *Scalindua* genomes  
122 (Supplementary Table S4). We calculated an iRep value of 1.32 for this genome  
123 (Supplementary Table S4), suggesting that 32% of this population was in a state of active  
124 replication at the sampling time, consistent with the deduced *in situ* growth described above.  
125 The assembled (full-length) 16S rRNA gene sequence of this genome is identical to that of the  
126 dominant *Scalindua* found in our 16S rRNA amplicon analysis (Fig. 3a), suggesting that this  
127 genome represents the most dominant *Scalindua* species in the NATZ. The genome shares  
128 less than 90% 16S rRNA sequence identity and 74-81% of genomic ANI (average nucleotide  
129 identity) with previously characterized *Scalindua* species from other marine habitats,

130 including *Ca. S. rubra*<sup>20</sup> and *Ca. S. AMX11*<sup>21</sup> from seawater, *Ca. S. japonica*<sup>22</sup> and *Ca. S.*  
131 *profunda*<sup>23</sup> enriched from coastal sediments. Its 16S rRNA gene forms a monophyletic clade  
132 with *Ca. S. pacifica* (a genotype detected in coastal Bohai Sea sediments<sup>24</sup>) and other  
133 uncultured *Scalindua* from marine sediments (Fig. 3a). Consistent with this ecotype-specific  
134 pattern, a search using the 16S rRNA gene as a query against the NCBI short reads archive  
135 (See Methods) showed that the *Scalindua* species represented by this bacterium (97% 16S  
136 rRNA nucleotide identity) were present in 120 samples (as of October 2018), all of which  
137 were marine sediments if only natural environments were considered (Supplementary Table  
138 S3). Phylogenetic analyses of concatenated ribosomal proteins (Fig. 3b) and the hydrazine  
139 synthase alpha subunit (HzsA, Supplementary Fig. S3) confirmed that this genome represents  
140 a deep-branching lineage within the genus of *Scalindua*. This genome has the complete core  
141 genetic machinery to perform anammox, including the nitrite disproportionation to nitrate by  
142 nitrite oxidoreductase (NXR) and to nitric oxide (NO) by octaheme hydroxylamine  
143 oxidoreductase (HAO)<sup>25</sup>, hydrazine synthesis from NO and NH<sub>4</sub><sup>+</sup> catalyzed by HZS, and  
144 hydrazine degradation to N<sub>2</sub> by hydrazine dehydratase (HZO) (Fig. 4). We propose a  
145 provisional taxon name for this uncultivated anammox bacterium, “*Candidatus Scalindua*  
146 *sediminis*”, based on its prevalence in deep marine sediments.

147 Notably, *Ca. S. sediminis* has the potential of utilizing urea and cyanate indicating a  
148 versatile metabolic lifestyle. For urea metabolism, it encodes a urease operon (UreABC) and a  
149 urea-specific ABC transporter, as well as several urease accessory proteins (UreDEFG) that  
150 facilitate the transportation and intracellular degradation of urea to NH<sub>4</sub><sup>+</sup> (Fig. 4). For cyanate  
151 metabolism, it has two copies of cyanate hydratase (encoded by *cynS*), catalyzing the  
152 degradation of cyanate to NH<sub>4</sub><sup>+</sup> and CO<sub>2</sub> (Fig. 4 and Supplementary Fig S5). *UreC* phylogeny  
153 showed that *Ca. S. sediminis* forms a branch well-separated from known urea-utilizing  
154 nitrifiers [e.g. Thaumarchaeota, ammonia- (AOB) and nitrite-oxidizing bacteria (NOB)]

155 (Supplementary Fig. S4), suggesting that *Ca. S. sediminis* had acquired the urea-utilizing  
156 capacity independently from the known urea-utilizing nitrifying organisms. Urea and cyanate  
157 are two dissolved organic nitrogen compounds ubiquitously present in seawater<sup>26</sup>, and also  
158 detected in marine sediment porewater<sup>27</sup>. The utilizations of these two compounds have been  
159 suggested for *Scalindua* lineages found in oxygen minimum zones based on chemical  
160 measurements<sup>28,29</sup> and supported by single-cell genome sequencing<sup>30</sup>. Here we expand this  
161 observation to marine sediments, by unambiguously identifying a urease and two cyanases in  
162 a single sediment *Ca. Scalindua* genome. These two metabolic traits may not only enable *Ca.*  
163 *S. sediminis* to have access to alternative energy sources (i.e. urea and cyanate), but also  
164 provide it with extra ammonium to persist under the severe competition disadvantage with  
165 ammonia oxidizing Thaumarchaeota<sup>31</sup> in the upper low-oxic sediment layers.

166 Compared to the other five existing *Scalindua* draft genomes, *Ca. S. sediminis* is  
167 enriched in genes involved in transport and metabolism of amino acids, nucleotides,  
168 coenzymes, and lipids (Supplementary Fig. S6). In addition, *Ca. S. sediminis* encodes the  
169 lactate racemase, which is absent in other *Scalindua* genomes and could provide a rescue  
170 pathway to supply D-lactate for the cell wall synthesis during growth<sup>32</sup> when the growth-  
171 arrested status in the subsurface is relieved in the NATZ. *Ca. S. sediminis* is also unique in  
172 encoding genes for archaeal vacuolar-type H<sup>+</sup>-ATPase and multisubunit Na<sup>+</sup>/H<sup>+</sup> antiporter  
173 that could decrease the energy requirement for ATP synthesis by reducing the membrane ion  
174 electrochemical potential<sup>33</sup>. In addition, the RecF DNA repair pathway might also be a  
175 critical mechanism of microbial adjustment to an energy-deprived environment<sup>3</sup>. Thus, the  
176 *Ca. S. sediminis* genome has extensive genetic features to invade and subsist in the energy-  
177 limiting subseafloor biosphere.

178 In summary we show that *Scalindua* can grow *in situ* in the subsurface NATZ, an  
179 important yet overlooked GTZ. Growth was qualitatively linked to the increased availability

180 of power, the ultimate control of all life forms. Considering the widespread occurrence of  
181 NATZ (Fig. 1b) and other transition zones<sup>34</sup>, net growth of anammox bacteria but also other  
182 organisms in the marine deep biosphere is expected to occur ubiquitously. The predominant  
183 *Ca. S. sediminis* in NATZ has genomic features that enable it to have access to alternative  
184 energy sources (e.g. urea and cyanate) and adapt to energy-limiting conditions. Our study  
185 provides evidence that certain microbial groups can maintain the dividing capacity despite  
186 being buried in the sediments for up to 80,000 years.

187

### 188 **Acknowledgments**

189 We thank the chief scientist Rolf Birger Pedersen and the crew of R/V *G.O. Sars* for the  
190 retrieval of sediment cores, Anita-Elin Fedøy for the amplicon preparation, Michael Melcher,  
191 Steffen Lydvo and Gustavo Ramirez for sampling collection and DNA extraction, Jan-  
192 Kristoffer Landro for sediment carbon and nitrogen contents measurements, and Thomas  
193 Pollak for metagenome library preparation. Computational resources were made possible  
194 through the BIOMIX compute cluster (Delaware INBRE grant NIGMS P20GM103446). This  
195 work was funded by the Research Council of Norway through the Centre for Excellence in  
196 Geobiology, the K.G. Jebsen Foundation and Trond Mohns Science Foundation (to S.L.J.).  
197 S.S.A. and C.S. were supported by the Austrian Science Fund through grant P27017. R.Z. and  
198 J.F.B. was funded in part by the WM Keck Foundation.

199

### 200 **Data availability**

201 All sequencing data used in this study are available in NCBI Short Reads Archive under the  
202 project number PRJNA529480. In particular, the raw metagenomic sequencing data are  
203 available in NCBI under the BioSample number SAMN11268106. The *Ca. S. sediminis*  
204 genome is available at NCBI under the accession number SAMN12415826.

205



206 **Author contributions**

207 R.Z. and S.L.J. conceived the study. R.Z., D.R., I.H.T, and S.L.J. onboard the cruises and  
208 collected the samples. R.Z. screened the NATZ signature in literature. D.R. and I.H.T.  
209 performed the porewater extraction and analysis. R.Z. and J.M.M. performed the geochemical  
210 modeling. R.Z., S.S.A., C.S, and S.L.J. generated the metagenome data. R.Z. and S.S.A.  
211 performed metagenome assembly and binning. R.Z., S.L.J., J.F.B., and C.S interpreted results.  
212 R.Z. and S.L.J. wrote, and all authors edited and approved the manuscript.

213

214 **Competing interests**

215 The authors declare no competing interests.

216

217

218 **References**

- 219 1 Kallmeyer, J., Pockalny, R., Adhikari, R. R., Smith, D. C. & D'Hondt, S. Global  
220 distribution of microbial abundance and biomass in subseafloor sediment. *Proceedings*  
221 *of the National Academy of Sciences of the United States of America* **109**, 16213-  
222 16216, doi:10.1073/pnas.1203849109 (2012).
- 223 2 Hoehler, T. M. & Jørgensen, B. B. Microbial life under extreme energy limitation.  
224 *Nature Reviews Microbiology* **11**, 83-94, doi:10.1038/nrmicro2939 (2013).
- 225 3 Jørgensen, B. B. & Marshall, I. P. G. in *Annual Review of Marine Science, Vol 8* Vol.  
226 *8 Annual Review of Marine Science* (eds C. A. Carlson & S. J. Giovannoni) 311-332  
227 (2016).
- 228 4 Parkes, R. J. *et al.* A review of prokaryotic populations and processes in sub-seafloor  
229 sediments, including biosphere:geosphere interactions. *Marine Geology* **352**, 409-425,  
230 doi:10.1016/j.margeo.2014.02.009 (2014).
- 231 5 Jørgensen, B. B. & Boetius, A. Feast and famine - microbial life in the deep-sea bed.  
232 *Nature Reviews Microbiology* **5**, 770-781, doi:10.1038/nrmicro1745 (2007).
- 233 6 Morono, Y. *et al.* Carbon and nitrogen assimilation in deep subseafloor microbial cells.  
234 *Proceedings of the National Academy of Sciences of the United States of America* **108**,  
235 18295-18300, doi:10.1073/pnas.1107763108 (2011).
- 236 7 Orsi, W. D., Edgcomb, V. P., Christman, G. D. & Biddle, J. F. Gene expression in the  
237 deep biosphere. *Nature* **499**, 205-208, doi:10.1038/nature12230 (2013).

- 238 8 Røy, H. *et al.* Aerobic Microbial Respiration in 86-Million-Year-Old Deep-Sea Red  
239 Clay. *Science* **336**, 922-925, doi:10.1126/science.1219424 (2012).
- 240 9 D'Hondt, S., Rutherford, S. & Spivack, A. J. Metabolic activity of subsurface life in  
241 deep-sea sediments. *Science* **295**, 2067-2070, doi:10.1126/science.1064878 (2002).
- 242 10 Lomstein, B. A., Langerhuus, A. T., D'Hondt, S., Jorgensen, B. B. & Spivack, A. J.  
243 Endospore abundance, microbial growth and necromass turnover in deep sub-seafloor  
244 sediment. *Nature* **484**, 101-104, doi:10.1038/nature10905 (2012).
- 245 11 Starnawski, P. *et al.* Microbial community assembly and evolution in subseafloor  
246 sediment. *Proceedings of the National Academy of Sciences of the United States of*  
247 *America* **114**, 2940-2945, doi:10.1073/pnas.1614190114 (2017).
- 248 12 Trembath-Reichert, E. *et al.* Methyl-compound use and slow growth characterize  
249 microbial life in 2-km-deep subseafloor coal and shale beds. *Proceedings of the*  
250 *National Academy of Sciences of the United States of America* **114**, E9206-E9215,  
251 doi:10.1073/pnas.1707525114 (2017).
- 252 13 LaRowe, D. E. & Amend, J. P. Catabolic rates, population sizes and  
253 doubling/replacement times of microorganisms in natural settings. *American Journal*  
254 *of Science* **315**, 167-203 (2015).
- 255 14 Parkes, R. J. *et al.* Deep sub-seafloor prokaryotes stimulated at interfaces over  
256 geological time. *Nature* **436**, 390-394, doi:10.1038/nature03796 (2005).
- 257 15 Zhao, R., Hannisdal, B., Mogollon, J. M. & Jørgensen, S. L. Nitrifier abundance and  
258 diversity peak at deep redox transition zones. *Scientific Reports* **9**, 8633 (2019).
- 259 16 Mogollón, J. M., Mewes, K. & Kasten, S. Quantifying manganese and nitrogen cycle  
260 coupling in manganese - rich, organic carbon - starved marine sediments: Examples  
261 from the Clarion - Clipperton fracture zone. *Geophysical Research Letters* **43**, 7114-  
262 7123 (2016).
- 263 17 Berg, H. C. The rotary motor of bacterial flagella. *Annual Review of Biochemistry* **72**,  
264 19-54, doi:10.1146/annurev.biochem.72.121801.161737 (2003).
- 265 18 Friedlander, R. S. *et al.* Bacterial flagella explore microscale hummocks and hollows  
266 to increase adhesion. *Proceedings of the National Academy of Sciences of the United*  
267 *States of America* **110**, 5624-5629, doi:10.1073/pnas.1219662110 (2013).
- 268 19 Probandt, D., Eickhorst, T., Ellrott, A., Amann, R. & Knittel, K. Microbial life on a  
269 sand grain: from bulk sediment to single grains. *ISME Journal* **12**, 623-633,  
270 doi:10.1038/ismej.2017.197 (2018).
- 271 20 Speth, D. R. *et al.* Draft genome of *Scalindua rubra*, obtained from the interface above  
272 the discovery deep brine in the Red Sea, sheds light on potential salt adaptation  
273 strategies in anammox bacteria. *Microbial Ecology* **74**, 1-5, doi:10.1007/s00248-017-  
274 0929-7 (2017).

- 275 21 Ali, M., Shaw, D. R. & Saikaly, P. E. Draft Genome Sequence of a Novel Marine  
276 Anaerobic Ammonium-Oxidizing Bacterium, "Candidatus Scalindua sp."  
277 *Microbiology resource announcements* **8**, e00297-00219 (2019).
- 278 22 Oshiki, M. *et al.* Genetic diversity of marine anaerobic ammonium-oxidizing bacteria  
279 as revealed by genomic and proteomic analyses of "Candidatus Scalindua japonica".  
280 *Environmental Microbiology Reports* **9**, 550-561, doi:10.1111/1758-2229.12586  
281 (2017).
- 282 23 van de Vossenberg, J. *et al.* The metagenome of the marine anammox bacterium  
283 'Candidatus Scalindua profunda' illustrates the versatility of this globally important  
284 nitrogen cycle bacterium. *Environmental microbiology* **15**, 1275-1289 (2013).
- 285 24 Dang, H. Y. *et al.* Molecular detection of Candidatus Scalindua pacifica and  
286 environmental responses of sediment anammox bacterial community in the Bohai Sea,  
287 China. *PLoS One* **8**, e61330, doi:10.1371/journal.pone.0061330 (2013).
- 288 25 Hu, Z., Wessels, H. J. C. T., van Alen, T., Jetten, M. S. M. & Kartal, B. Nitric oxide-  
289 dependent anaerobic ammonium oxidation. *Nature Communications* **10**, 1244,  
290 doi:10.1038/s41467-019-09268-w (2019).
- 291 26 Kitzinger, K. *et al.* Cyanate and urea are substrates for nitrification by  
292 Thaumarchaeota in the marine environment. *Nature microbiology* **4**, 234 (2019).
- 293 27 Hulth, S., Hall, P. O. J., Blackburn, T. H. & Landen, A. Arctic sediments (Svalbard):  
294 Pore water and solid phase distributions of C, N, P and Si. *Polar Biology* **16**, 447-462,  
295 doi:10.1007/bf02390426 (1996).
- 296 28 Babbin, A. R. *et al.* Multiple metabolisms constrain the anaerobic nitrite budget in the  
297 Eastern Tropical South Pacific. *Global Biogeochemical Cycles* **31**, 258-271 (2017).
- 298 29 Widner, B., Mordy, C. W. & Mulholland, M. R. Cyanate distribution and uptake  
299 above and within the Eastern Tropical South Pacific oxygen deficient zone. *Limnology  
300 and Oceanography* **63**, S177-S192, doi:10.1002/lno.10730 (2018).
- 301 30 Ganesh, S. *et al.* Single cell genomic and transcriptomic evidence for the use of  
302 alternative nitrogen substrates by anammox bacteria. *ISME Journal* **12**, 2706-2722,  
303 doi:10.1038/s41396-018-0223-9 (2018).
- 304 31 Straka, L. L., Meinhardt, K. A., Bollmann, A., Stahl, D. A. & Winkler, M.-K. H.  
305 Affinity informs environmental cooperation between ammonia-oxidizing archaea  
306 (AOA) and anaerobic ammonia-oxidizing (Anammox) bacteria. *The ISME Journal*,  
307 doi:10.1038/s41396-019-0408-x (2019).
- 308 32 Goffin, P. *et al.* Lactate racemization as a rescue pathway for supplying D-lactate to  
309 the cell wall biosynthesis machinery in *Lactobacillus plantarum*. *Journal of  
310 Bacteriology* **187**, 6750-6761, doi:10.1128/jb.187.19.6750-6761.2005 (2005).
- 311 33 Müller, V. & Hess, V. The minimum biological energy quantum. *Frontiers in  
312 microbiology* **8**, 2019 (2017).

313 34 Egger, M., Riedinger, N., Mogollón, J. M. & Jørgensen, B. B. Global diffusive fluxes  
314 of methane in marine sediments. *Nature Geoscience* **11**, 421-425, doi:10.1038/s41561-  
315 018-0122-8 (2018).

316

317 **Figure and Tables**

318

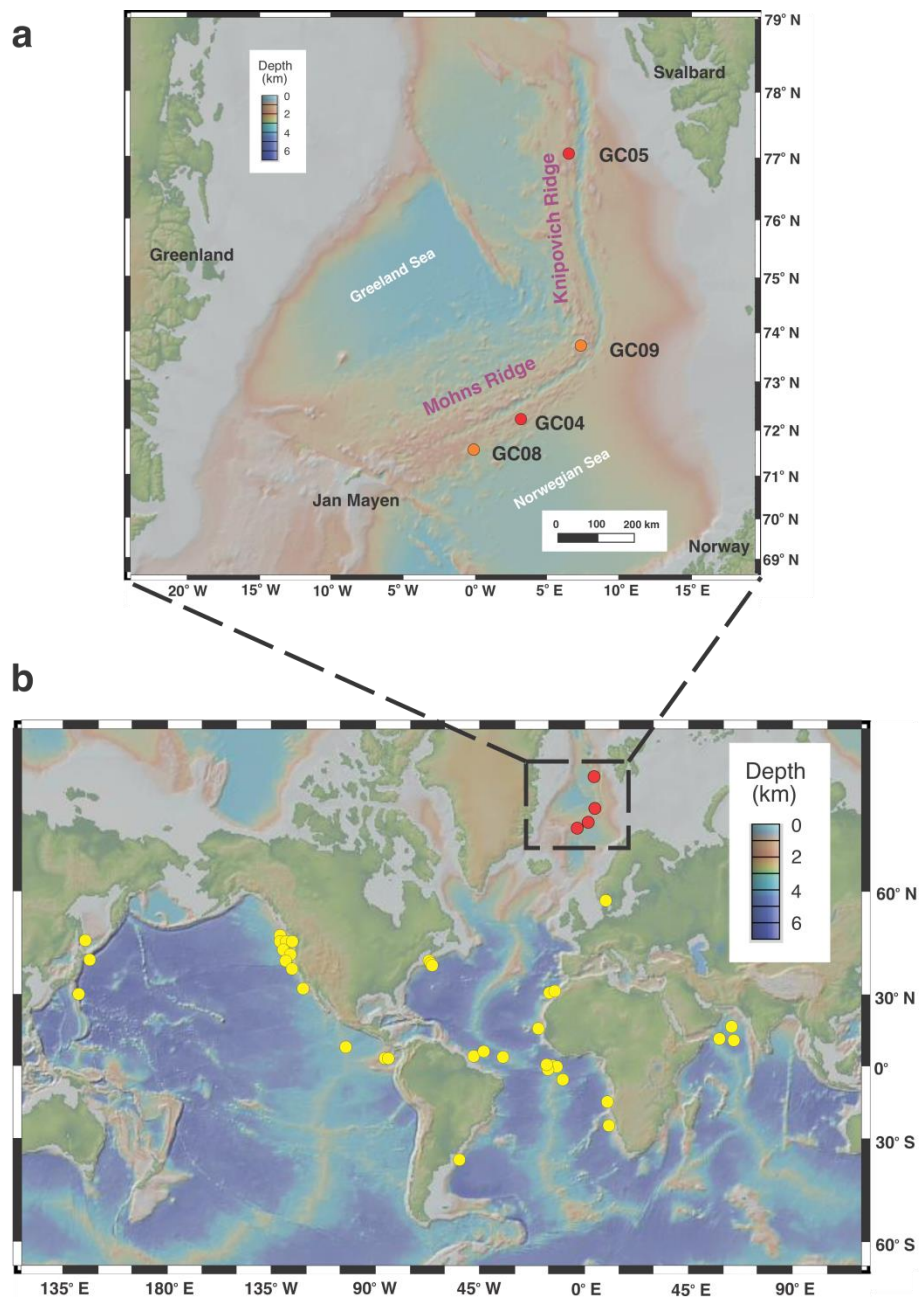

319

320 **Figure 1. Sampling site of this study (a) and the global occurrence of nitrate-ammonium**  
321 **transition zone (NATZ) (b).** (a) Bathymetry map of the Arctic Mid-Ocean Ridge highlighting Mohns  
322 Ridge and Knipovich Ridge in the Norwegian-Greenland Sea. Cores GC08 and GC09 (orange) were  
323 sampled during the CGB 2014 summer cruise. Cores GC04 and GC05 (red) were sampled during the  
324 CGB 2016 summer cruise. Map was created in GeoMapApp version 3.6.10 using the default Global  
325 Multi-Resolution Topography Synthesis (Ryan et al., 2009) basemap. (b) Location of marine  
326 sediments bearing an observed NATZ, which was identified based on the measured profiles of nitrate  
327 and ammonium. The box corresponds to the AMOR area shown in the upper panel (a).

328

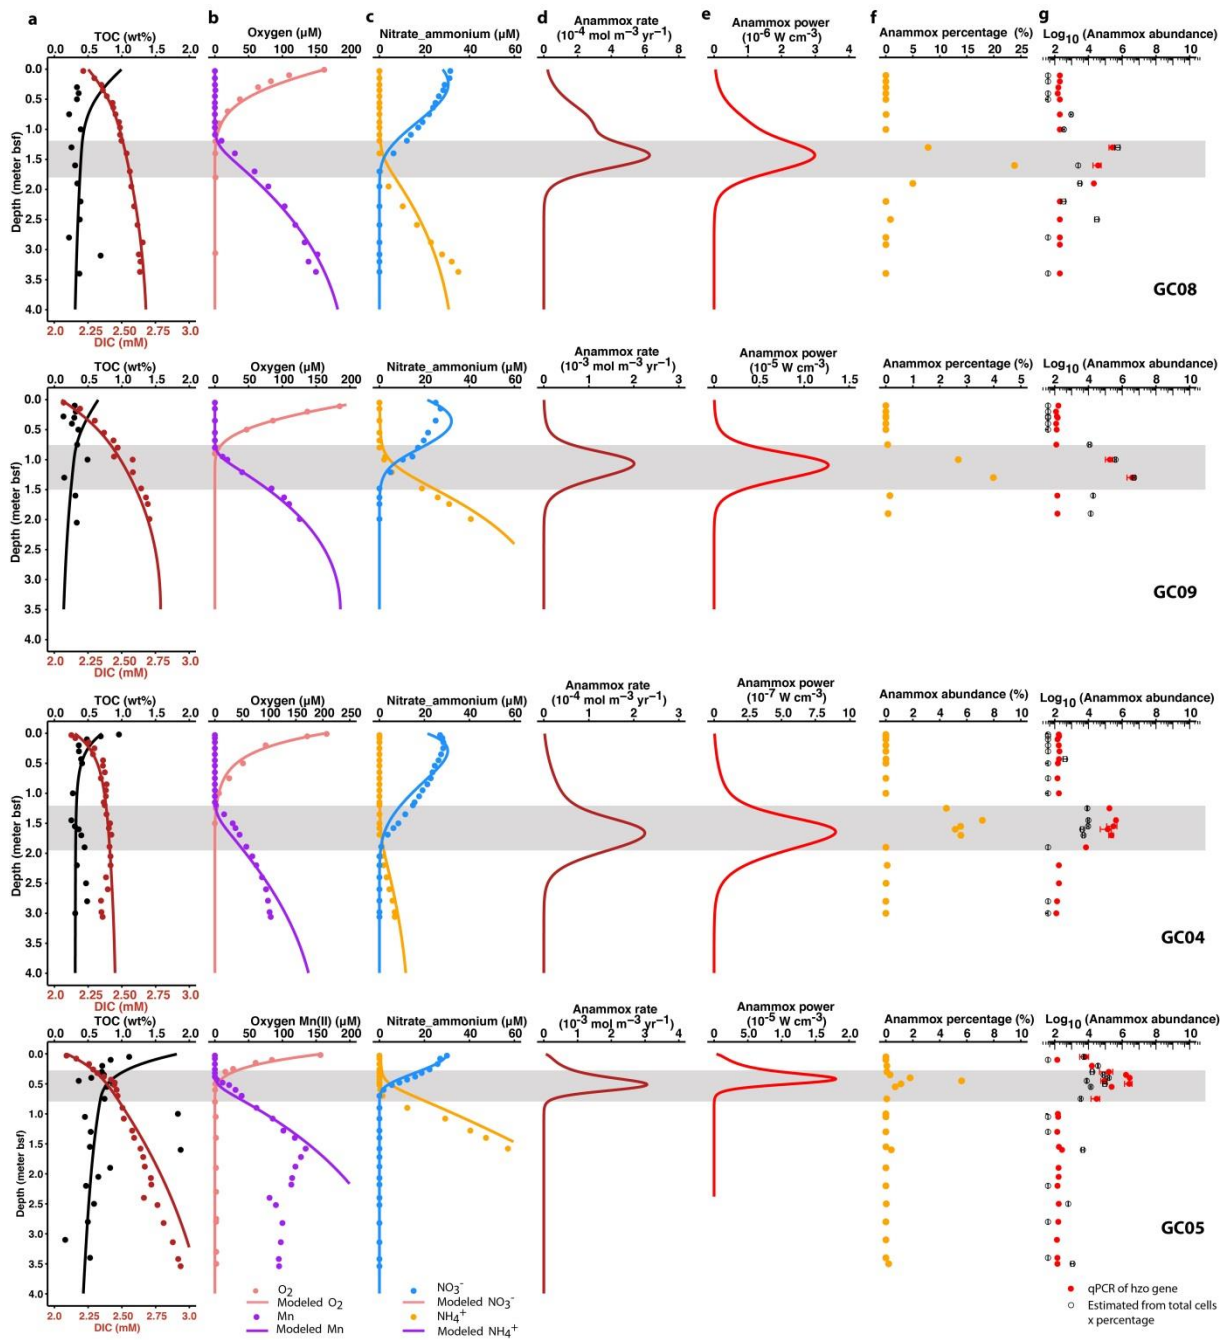

329

330 **Figure 2. Distribution of anammox bacteria abundances and reaction rates.** a-c) Measured (dots)  
 331 and modeled (lines) depth profiles of total organic carbon (TOC), dissolved inorganic carbon (DIC),  
 332 oxygen, dissolved manganese, nitrate and ammonium. d) Anammox rate calculated based on model  
 333 simulation. e) Power supply of anammox calculated as the products of anammox rate and Gibbs free  
 334 energy per anammox reaction presented in Supplementary Fig. S1. f) Percentage of anammox bacteria  
 335 from the genus *Scalindua* in the amplicon libraries. g) Anammox bacteria abundance quantified by  
 336 two methods: 1) qPCR targeting the *hzo* gene (encoding the hydrazine dehydrogenase) (filled red dots),  
 337 and 2) estimated as the products of anammox bacteria percentage in (f) and the total cell abundances  
 338 quantified by 16S rRNA genes (open dots). The NATZ in each core is highlighted by a grey box.

339

340

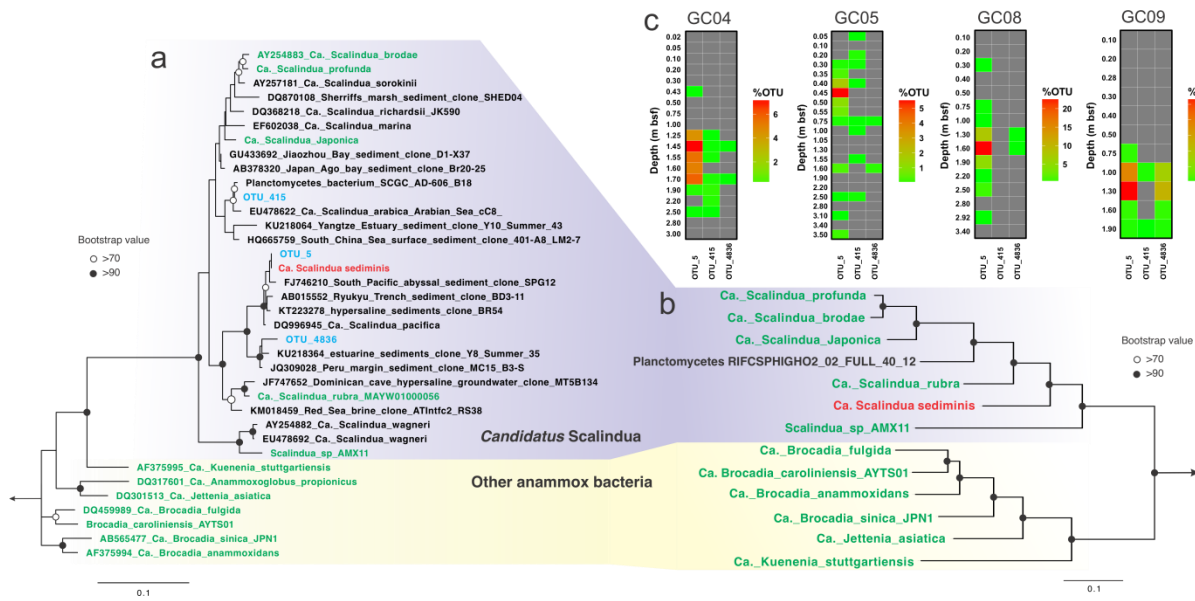

341

342 **Figure 3. Phylogeny and vertical distribution pattern of *Scalindua* bacteria in AMOR sediments. (a)** 16S  
 343 rRNA phylogenetic tree of anammox bacteria. The three *Scalindua* OTUs recovered from the AMOR sediments  
 344 via 16S rRNA gene amplicon sequencing are shown in blue. The tree was constructed by maximum-likelihood  
 345 using RAxML with the GTAGRAMMA model. (b) Phylogenetic tree of anammox bacteria inferred from 13  
 346 concatenated ribosomal protein genes (rpL2, 3, 4, 5, 6, 14, 15, 18, 22 and rpS3, 8, 10, 17, 19). The tree was  
 347 constructed by maximum-likelihood using RAxML, with PROTGAMMALG as the evolutionary model. In both  
 348 (a) and (b) *Ca. Scalindua sediminis* is highlighted in red, while known anammox bacteria are highlighted in  
 349 green. *Paludisphaera borealis* PX4 and *Isosphaera pallida* were used as the outgroup for both trees. Bootstrap  
 350 values higher than 70 and 90 were shown on nodes with open and filled circles, respectively. The scale bars  
 351 correspond to substitution per site. (c) Distribution of *Scalindua* OTUs in the four AMOR sediment cores.  
 352 Depths of sediment horizons (meters below seafloor) are indicated on the vertical axis for each core. Note  
 353 different scales are used for the anammox OTU percentages (of total community) in different cores.

354

355

356

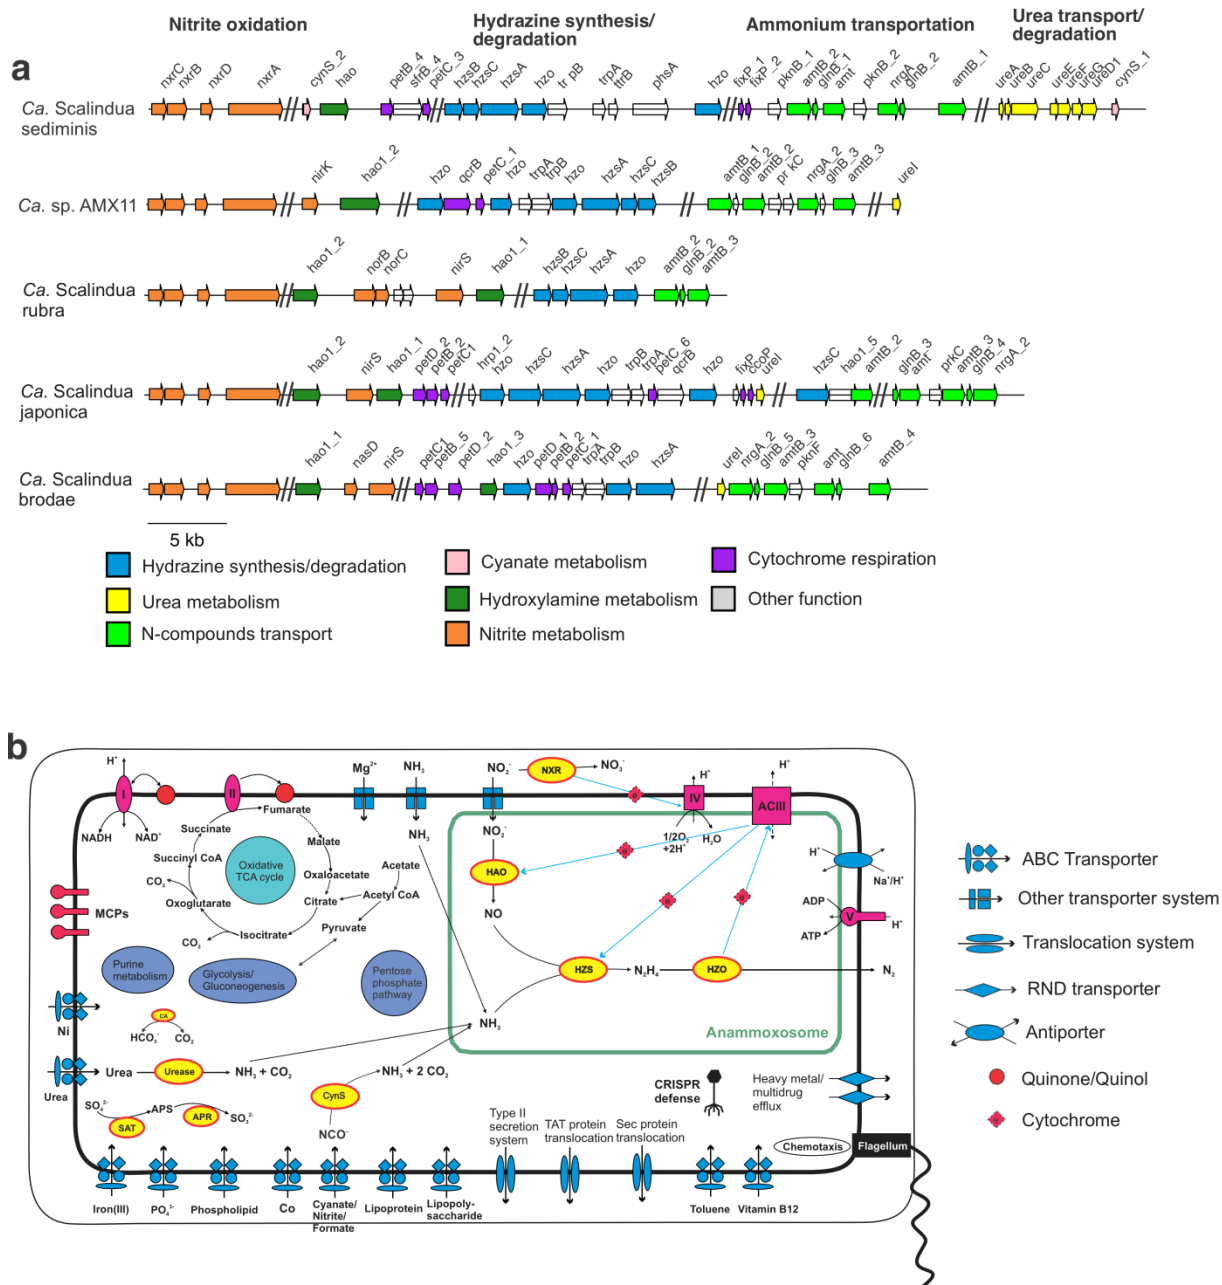

357

358 **Figure 4. Key genome regions (a) and metabolic potential (b) of “*Candidatus Scalindua sediminis*”.**  
 359 Schematic representation of key genome regions in *Ca. Scalindua* genomes. Arrows represent genes and indicate  
 360 the transcriptional direction. Homologous genes are connected by lines. Genes are drawn to scale. **(b)**  
 361 **Reconstruction of cell metabolic pathways based on the annotation of the “*Candidatus Scalindua sediminis*”**  
 362 **genome.** Enzyme complexes of the electron transport chain are labelled with Roman numerals. The flow of  
 363 electron transfer is represented by blue arrows. ACIII, alternative complex III; CA, carbonic anhydrase; CoA,  
 364 coenzyme A; CRISPR, clustered regularly interspaced short palindromic repeats; SAT, sulfate adenylate  
 365 transferase; APR, adenosine-5'-phosphosulfate reductase; ASR, anaerobic sulfite reductase; CynS, cyanate  
 366 hydratase; HZS, hydrazine synthase; HZO, hydrazine dehydrogenase; MCPs, methyl-accepting chemotaxis  
 367 proteins; NIR, nitrite reductase; NXR, nitrite oxidoreductase; RND transporter, resistance-nodulation-cell  
 368 division transporter; TAT, twin-arginine translation; TCA cycle, tricarboxylic acid cycle; Sec, secretion.

369
